# Supplementary material for: Patterns of Treatment Failure in Patients with Sinonasal Mucosal Melanoma
Source: Springer Nature journal article supplement (doi:10.1245/s10434-018-6465-y), 2018-04-06
Supplement: MOESM1 [file 15597268]

**Supplemental Table 1.** Univariate analysis of overall survival and disease-specific survival in patients with sinonasal mucosal melanoma

| **Variable** | | **Overall survival** | | **Disease-specific survival** | |
| --- | --- | --- | --- | --- | --- |
| **HR (95% CI)** | ***p* value** | **HR (95% CI)** | ***p* value** |
| Sex | Male  Female | 1  1.1 (0.7-1.6) | 0.6 | 1  1.18 (0.72-1.94) | 0.49 |
| Age, years | <65  ≥65 | 1  1.01 (0.99-1.8) | 0.218 | 1  0.99 (1.02-1.00) | 0.94 |
| Tumor site | Nasal  Paranasal | 1  1.95 (1.25-2.94) | 0.003 | 1  2.46 (1.43-4.13) | 0.001 |
| Pathologic T classification | T3  T4a  T4b | 1  1.29 (0.82-1.98)  2.02 (1.14-3.4) | 0.04 | 1  1.36 (0.75-2.38)  2.3 (1.11-4.94) | 0.02 |
| Pathologic N classification | N0  N+ | 1  1.88 (0.94-4.4) | 0.07 | 1  1.91 (0.78-6.3) | 0.16 |
| Distant metastasis | M0  M+ | 1  4.01 (1.93-7.49) | 0.0006 | 1  3.12 (1.07-7.25) | 0.0383 |
| Tumor margin status | Negative  Positive | 1  1.46 (0.86-2.34) | 0.12 | 1  1.59 (0.84-2.99) | 0.14 |
| Local invasion | Absent  Present | 1  1.38 (0.72-3.26) | 0.15 | 1  1.79 (0.93-3.19) | 0.07 |
| Ulceration | Absent  Present | 1  0.92 (0.55-1.46) | 0.73 | 1  0.99 (0.51-1.77) | 0.99 |
| Mitosis | <1  ≥1 | 1  0.79 (0.48-1.25) | 0.33 | 1  1.11 (0.63-2.09) | 0.71 |
| Tumor thickness, mm | <4  ≥4 | 1  0.66 (0.32-1.38) | 0.27 | 1  1.63 (0.66-4.21) | 0.3 |
| Bone invasion | Absent  Present | 1  1.39 (0.74-2.41) | 0.26 | 1  1.17 (0.48-2.42) | 0.69 |
| Treatment | Surgery  SRT  SCRT | 1  1 (0.65-1.56)  0.91 (0.31-2.14) | 0.98 | 1  1.35 (0.74-2.55)  1.5 (0.45-4.3) | 0.53 |

Abbreviations: HR, hazard ratio; 95% CI, 95% confidence interval; SRT, surgery and radiotherapy; SCRT, surgery and chemoradiotherapy.

**Supplemental Table 2.** Univariate analysis of prognostic factors for disease-free survival, local recurrence-free survival, and distant metastasis in patients with sinonasal mucosal melanoma

| **Variable** | | **DFS** | | **LRFS** | | **DMFS** | |
| --- | --- | --- | --- | --- | --- | --- | --- |
| **HR (95% CI)** | ***p* value** | **HR (95% CI)** | ***p* value** | **HR (95% CI)** | ***p* value** |
| Sex | Male  Female | 1  1.24 (0.83-1.83) | 0.28 | 1  1.89 (0.89-4.12) | 0.09 | 1  0.91 (0.53-1.53) | 0.74 |
| Age, years | <65  ≥65 | 1  0.98 (0.96-1.00) | 0.07 | 1  0.99 (0.96-1.02) | 0.71 | 1  0.98 (0.11-1.33) | 0.12 |
| Tumor site | Nasal  Paranasal | 1  1.00 (0.62-1.70) | 0.99 | 1  1.21 (0.4-2.99) | 0.69 | 1  1.14 (0.57-2.09) | 0.67 |
| Pathologic T classification | T3  T4a  T4b | 1  0.89 (0.55-1.39)  1.05 (0.52-1.92) | 0.86 | 1  1.52 (0.61-4.6)  1.54 (0.44-9.6) | 0.61 | 1  1.45 (0.62-2.9)  2.06 (0.81-4.9) | 0.26 |
| Pathologic N classification | N0  N+ | 1  1.27 (0.69-2.61) | 0.45 | 1  3.7 (0.79-66.3) | 0.19 | 1  1.00 (0.41-2.06) | 0.99 |
| Distant metastasis | M0  M+ | 1  2.04 (0.63-12.4) | 0.26 | 1  1.31 (0.07-6.5) | 0.78 | 1  2.4 (0.53-43.94) | 0.29 |
| Tumor margins | Negative  Positive | 1  1.05 (0.62-1.73) | 0.83 | 1  7.43 (1.34-19.7) | 0.02 | 1  1.21 (0.63-2.26) | 0.55 |
| Local invasion | Absent  Present | 1  1.15 (0.66-2.17) | 0.62 | 1  2.17 (0.64-13.5) | 0.23 | 1  1.47 (0.7-2.79) | 0.28 |
| Ulceration | Absent  Present | 1  1.00 (0.63-1.65) | 0.97 | 1  1.11 (0.45-3.32) | 0.82 | 1  0.89 (0.45-1.63) | 0.74 |
| Mitosis | <1  ≥1 | 1  1.21 (0.77-1.97) | 0.41 | 1  1.88 (0.72-6.41) | 0.24 | 1  0.91 (0.48-1.62) | 0.76 |
| Tumor thickness, mm | <4  ≥4 | 1  2.06 (1.01-4.2) | 0.04 | 1  5.58 (1.06-40.78) | 0.04 | 1  1.5 (0.62-3.56) | 0.35 |
| Bone invasion | Absent  Present | 1  1.63 (0.9-2.7) | 0.1 | 1  3.01 (0.63-53.8) | 0.19 | 2.18 (1.07-4.09) | 0.02 |
| Treatment | Surgery  SRT  SCRT | 1  1.04 (0.68-1.6)  0.89 (0.36-1.87) | 0.91 | 1  1.02 (0.45-2.3)  1.34 (0.2-5.13) | 0.93 | 1  0.98 (0.57-1.71)  0.85 (0.25-2.23) | 0.95 |

Abbreviations: DFS, disease-free survival; LRFS, local recurrence-free survival; DMFS, distant metastasis-free survival; HR, hazard ratio; 95% CI, 95% confidence interval; SRT, surgery and radiotherapy; SCRT, surgery and chemoradiotherapy.
